# Supplementary material for: Improvement of Saline Soil Properties and <em>Brassica rapa L</em>. Growth Using Biofertilizers
Source: Preprints.org preprint supplement (doi:10.20944/preprints202311.0883.v1), 2023-11-14
Supplement: Supplementary file 1 [file supplementary]

Improvement of saline soil properties and *Brassica rapa* L. growth using biofertilizers

Rui Li 1,2, Bo Sun 1,2, Manjiao Song 1,2, Gaojun Yan 1,2, Qing Hu 2,3, Zhihui Bai 1,2,3,*, Jiancheng Wang 4,*, Xuliang Zhuang 1,2,5

1 Research Center for Eco-Environmental Sciences, Chinese Academy of Sciences, Beijing 100085, China

2 University of Chinese Academy of Sciences, Beijing 100049, China.

3 Xiongan Innovation Institute, Xiongan New Area, Hebei 071000, China.

4 Binzhou Institute of Technology, Weiqiao-UCAS Science and Technology Park, Binzhou, Shandong 256606, China

5 Institute of Tibetan Plateau Research, Chinese Academy of Sciences, Beijing 100101, China.

Correspondence: zhbai@rcees.ac.cn (Z.B.), wangjiancheng@wqucas.com (J.W.)

**Supplementary Materials:**

**Table S1** Properties of saline-alkali soil and organic fertilizers

| Soil sample | | Organic fertilizer | |
| --- | --- | --- | --- |
| TSSC (g kg-1) | 8.8±0.21 | OM (g kg-1) | 400±24 |
| pH | 8.65±0.56 | TN (g kg-1) | 18.0±1.17 |
| SOM (g kg-1) | 14.7±1.21 | P2O5 (g kg-1) | 11.1±0.21 |
| AP (mg kg-1) | 9.9±0.87 | K2O (g kg-1) | 5.8±0.11 |
| AK (mg kg-1) | 440±47 | TSSC (g kg-1) | 4.0±0.12 |
| TN (mg kg-1) | 613±55 |  |  |
| TC (g kg-1) | 21.3±1.26 |  |  |
| C/N ratio | 33.3±1.58 |  |  |


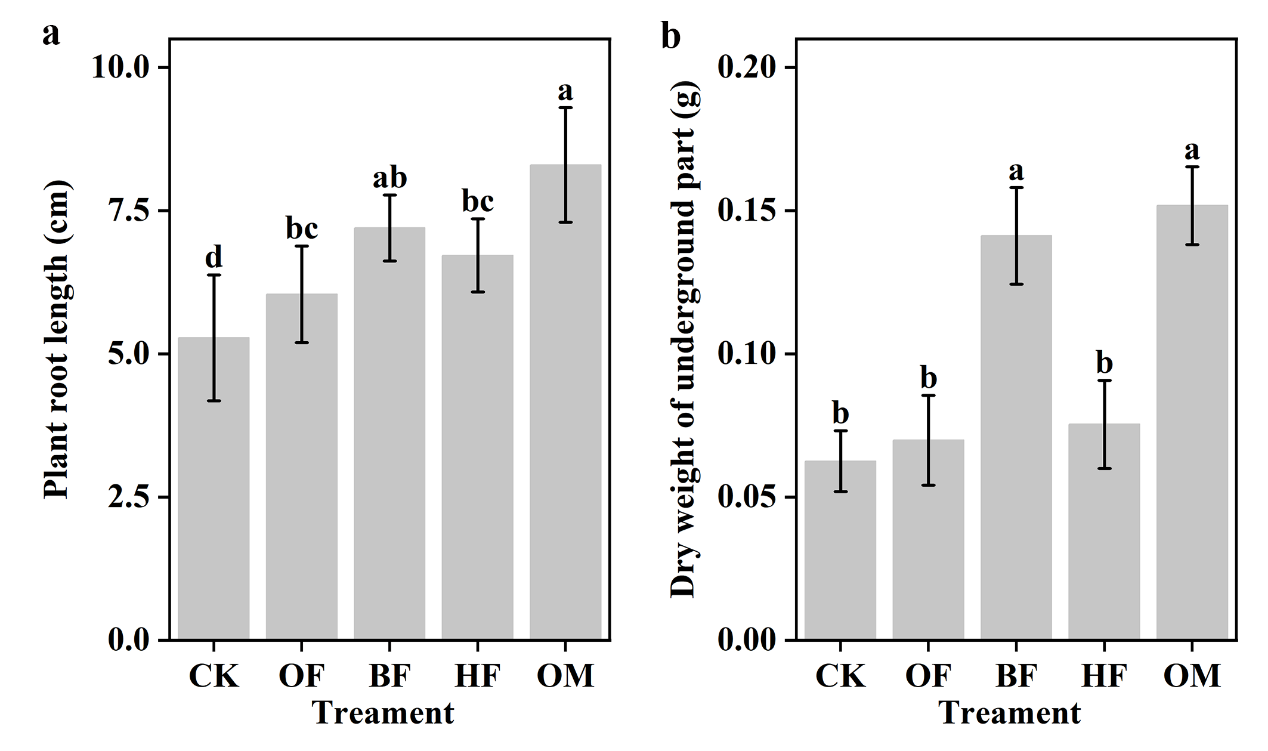


**Figure S1.** Plant root length (a) and dry weight of underground part (b) of plant. CK, control; OF, organic fertilizer; BF, organic fertilizer with *B. licheniformis*; HF, organic fertilizer with *H. profundi*. OM organic fertilizer with *B. licheniformis* and *H. profundi*. P-values were analyzed using one-way ANOVA and Student's t-test (*p* < 0.05).


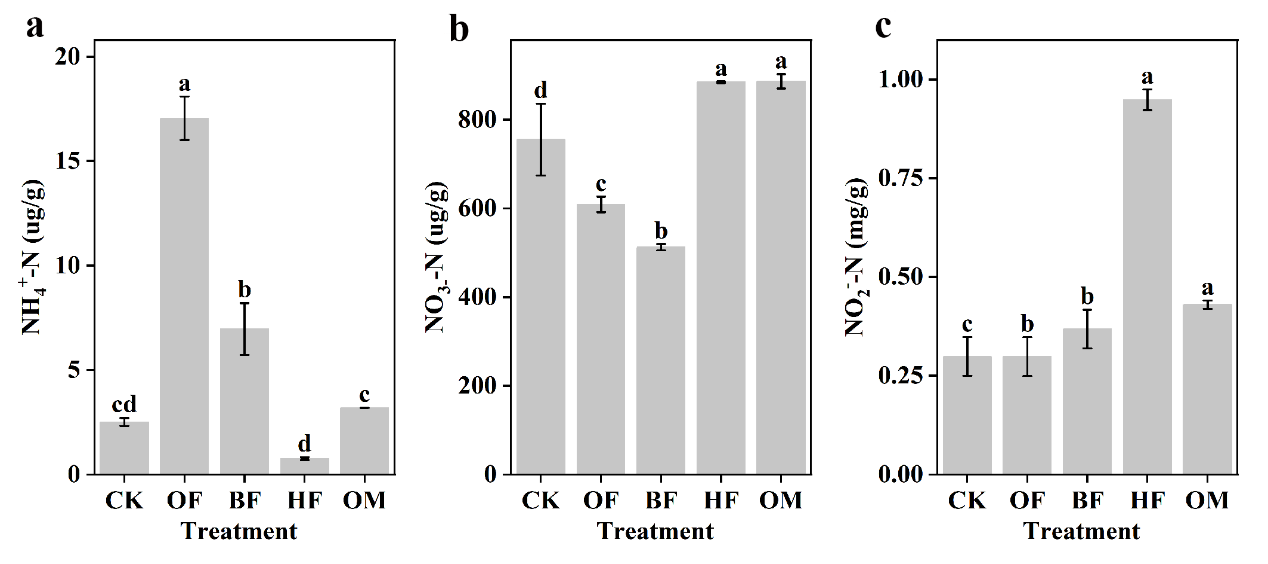


**Figure S2.** The content of NH4+-N (a), NO3--N (b), NO2--N (c) in the saline-alkali soil. CK, control; OF, organic fertilizer; BF, organic fertilizer with *B. licheniformis*; HF, organic fertilizer with *H. profundi*. OM organic fertilizer with *B. licheniformis* and *H. profundi*. P-values were analyzed using one-way ANOVA and Student's t-test (*p* < 0.05).
